# Supplementary material
Source: PubMed Central journal article supplement (PMC10133390)
Supplement: 41467_2023_38015_MOESM1_ESM.pdf [file 41467_2023_38015_MOESM1_ESM.pdf]

# **Large-scale phage-based screening reveals extensive pan-viral mimicry of host short linear motifs**

**Mihalic et al., 2023**

**SUPPLEMENTAL FIGURES AND TABLES**

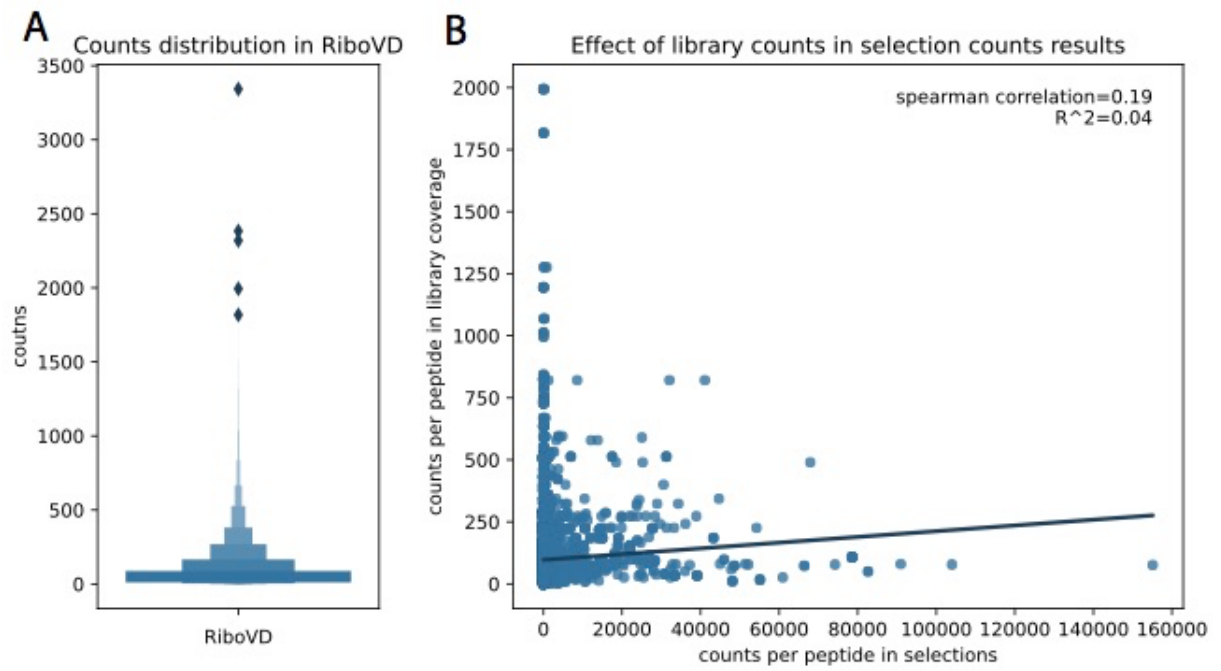

**Figure S1. RiboVD counts distribution and effect on selections.**

(A) RiboVD peptides count distribution (sequencing of naive library). (B) Correlation analysis between RiboVD peptides counts in coverage vs. medium-/high-confidence peptides counts in selections.

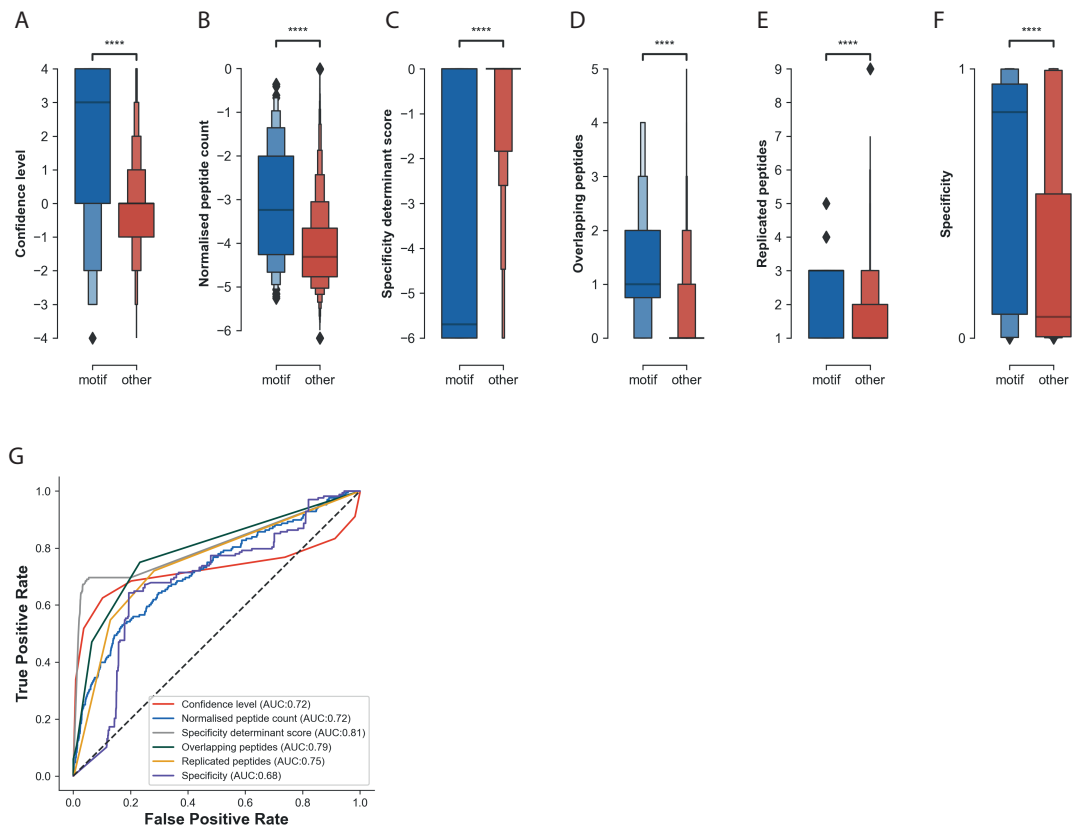

**Figure S2. Evaluation of metrics for assignment of confidence levels.**

(A-F). Boxen plot of motif-containing peptides from the benchmarking datasets (blue) compared (Mann–Whitney U test) to all other selected peptides (red) for (A) consensus confidence level (defined based on the replicated peptides, overlapping peptides, specificity determinant match, and normalized peptide count), (B) log<sub>10</sub> of the normalized peptide count, (C) log<sub>10</sub> of PSSM-derived specificity determinant score defining the similarity of the selected peptides to the SLiMFinder-discovered enriched motif (only available for baits with an enriched motif), (D) overlapping peptides, (E) replicated peptides, and (F) the specificity score.  $n_{\text{motif}} = 168$  and  $n_{\text{other}} = 84,919$  for all boxenplots with the exception of specificity in panel F where  $n_{\text{motif}} = 117$  and  $n_{\text{other}} = 17,039$ . Asterisks denote the likelihood of the null hypothesis that the distribution underlying each sample is the same using a Mann–Whitney U test (\*\*\*\*P-value =  $< 1.0 \times 10^{-4}$ ). Boxen plots (B-F) are used to more accurately visualize the distribution of values. The central section has two blocks each containing 25% of the data split by the median (denoted by a dark black bar) and each additional block represents 50% of the data of the previous block. (G) ROC curves of the metrics to assign confidence levels.

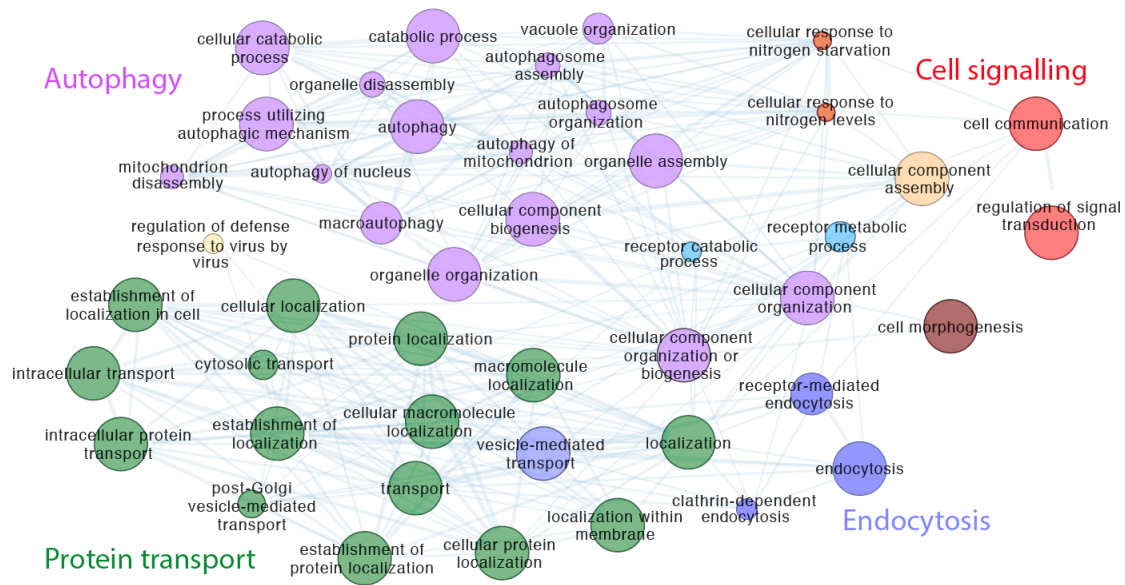

**Figure S3. GO Biological Process term enrichment of the expanded host-virus interaction network.**

Edges represent overlapping genes between the terms, Node size increases with the percentage of genes annotated with the specific term are found in the network, colors correspond to the respective annotated processes on the figure.

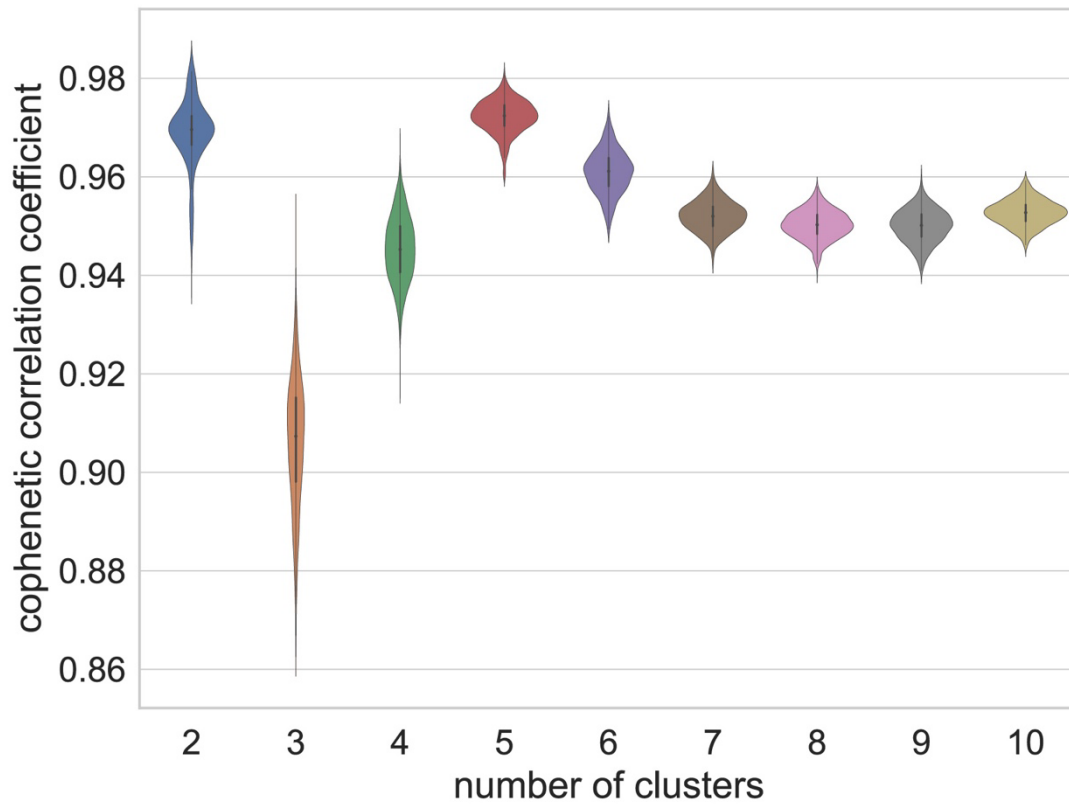

**Figure S4. Cophenetic correlation coefficient for different numbers of clusters (latent factors) to determine the numbers of clusters that provides robust cluster membership.** The distribution of the cophenetic correlation coefficient was derived from  $n=1000$  iterations of the NMF as described in the Methods.

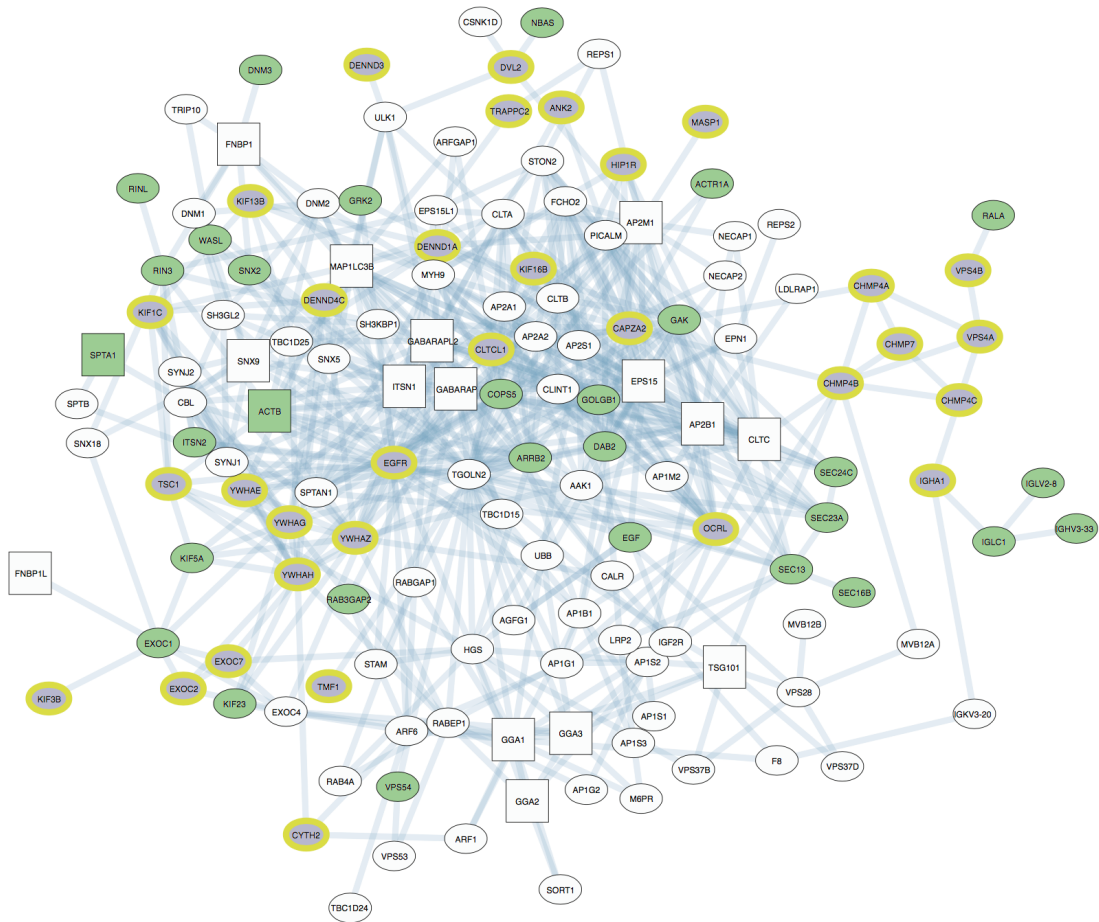

**Figure S5. Differences in the vesicle-mediated transport networks targeted by viruses in cluster 4 (green) vs those in cluster 5 (lilac/yellow). White nodes are common to both target networks. Squares indicate proteins used as baits in the experiment.**

### ALIX V

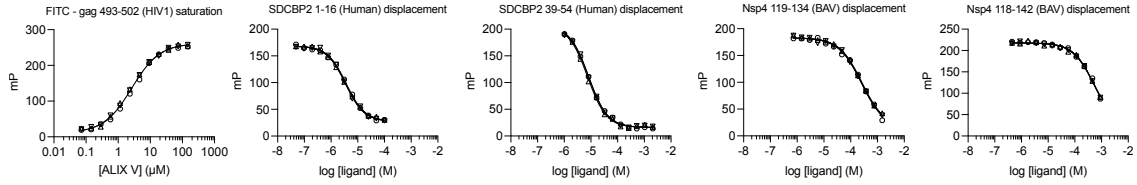

### TSG101 UEV

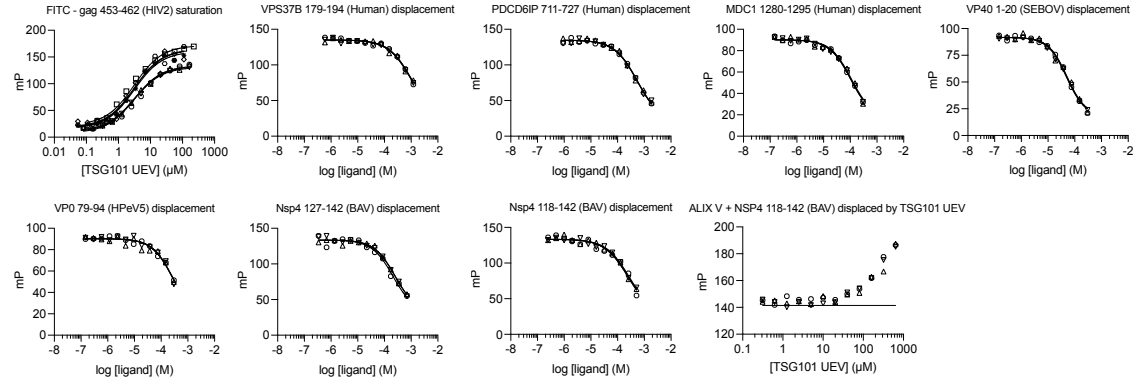

### NEDD4 WW2

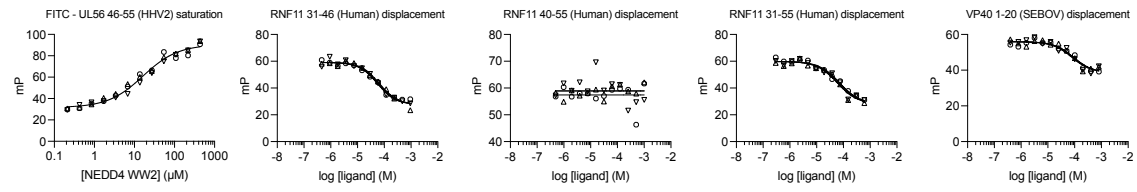

### NEDD4 WW4

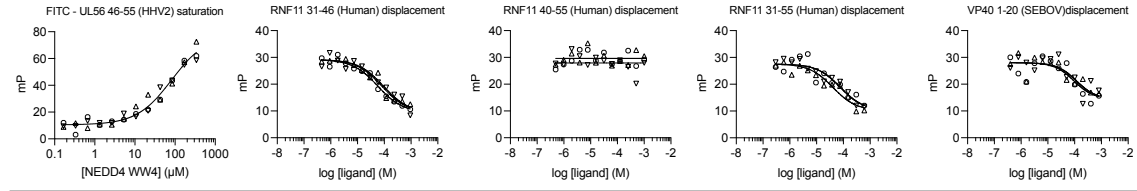

### CEP55 EABR

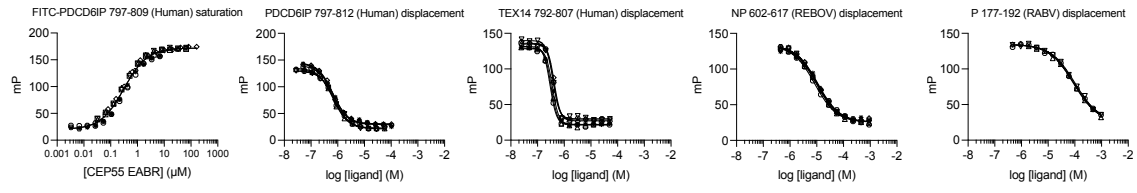

### CLTC NTD

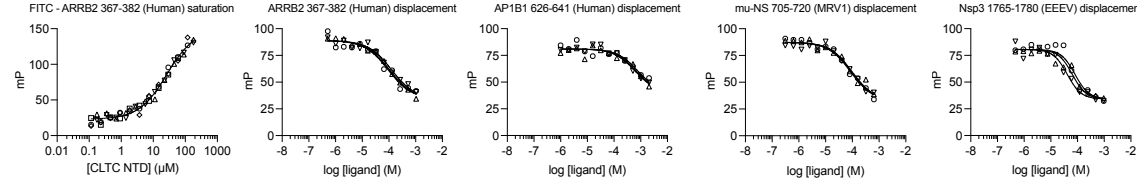

### AP2M1

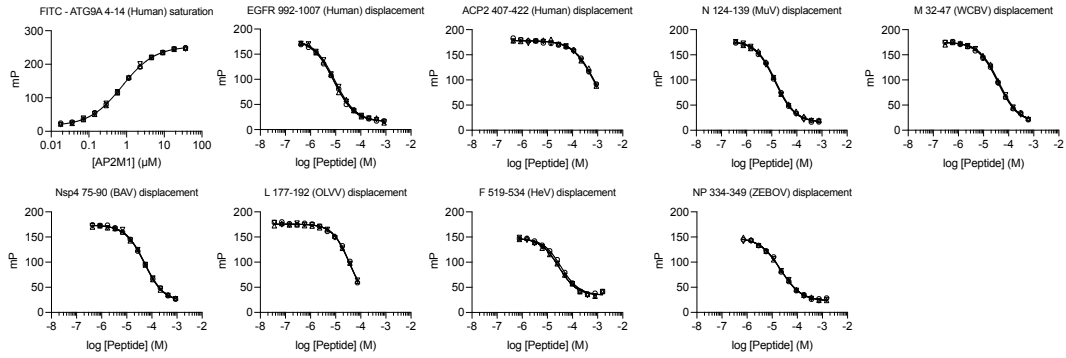

### GGA3 VHS

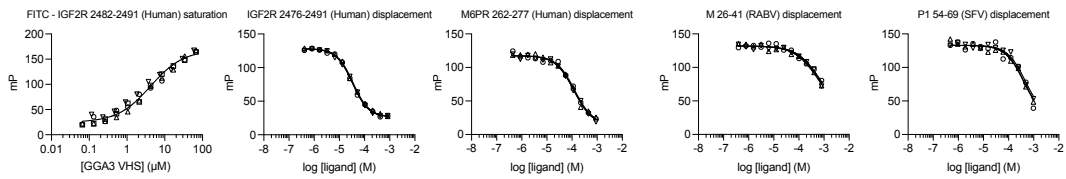

### GGA3 GAE

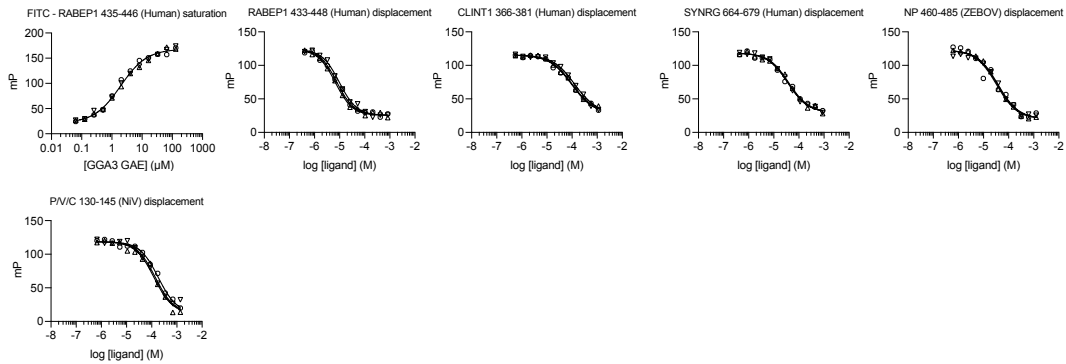

### PABP1 PABC

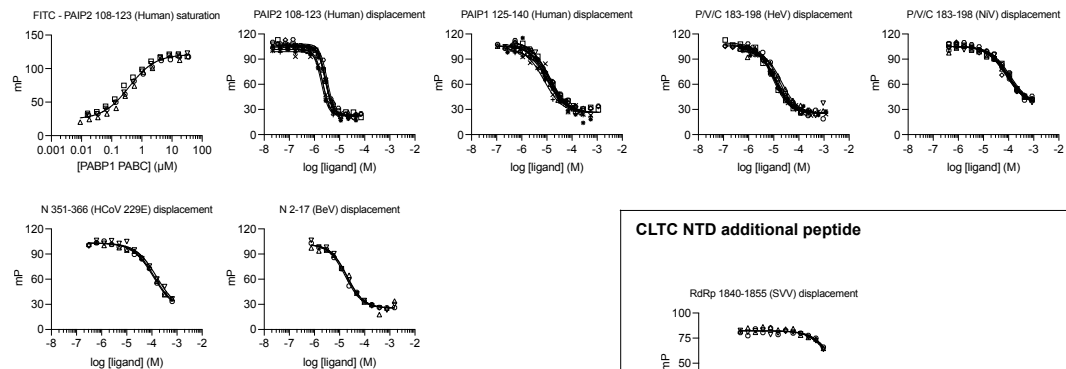

### CLTC NTD additional peptide

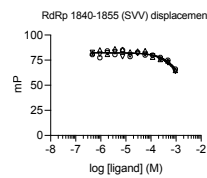

**Figure S6. All FP affinity measurements performed in this study.** Peptides used, and calculated affinities are presented in Table S8. Source data are provided as a Source Data file.



MDSRPQKIWMAPSLTESDMDYHKI LTAGLSVQQGIVRQRVIPVYQVNNLEEICQLIIQAFEAGVDFQESA  
DSFLLMLCLHHAYQGDYKLFLESGAVKYLEGHGFRFEVKKRDGVKRLLEELPAVSSGKNIKRTLAAMPEE  
ETTEANAGQFLSFASLFLPKLVVGEKACLEKVRQIQVHAEQGLIQYPTAWQSVGHMMVIFRLMRTNFLI  
KFLLIHQGMHMVAGHDANDAVISNSVAQARFSGLLIVKTVLDHILQKTERGVRHLHPLARTAKVNEVNSF  
KAALSSLAKHGEYAPFARLLNLSGVNNLEHGLFPQLSAIALGVATAHGSTLAGVNVGEQYQQI REAATEA  
EKQLQQYAESRELDHLGLDDQEKILMNFHQKKNEISFQQTNAMVTLRKERLAKLTEAITAASLPKTSGH  
YDDDDIPFPGPINDDDNPGHQDDDDPTDSQDTTIPDVVDPDDGSYGEYQSYSENGMNAPDDLVLFDLDE  
DDEDTKPVPNRSTKGGQQKNSQKQGHIEGRQTQSRPIQNVPGPHRTIHHASAPLTDNDRRNEPSGSTS  
MLTPINEEADPLDDADDETSSLPPLESDDDEQDRDGTNRTPTVAPPAPVYRDHSEKELPQDEQQDQDH  
TQEARNQSDNTQSEHSFEEMYRHLRSQGPFDVLYYHMMKDEPVVSTSDGKEYTYPDSLEEEYPPWL  
TEKEAMNEENRFVTLDGQQFYWPFV MNHKNKFMAILQHHQ

**Figure S7. Zaire ebolavirus Nucleoprotein sequence (Uniprot entry P18272).**

All of the instances matching the AP2M1 recognition motif as reported in eukaryotic linear motif database (ELM) are highlighted in blue. The AP2M1 interaction motif identified in this study is highlighted in green and the GGA3 GAE motif is highlighted in magenta.

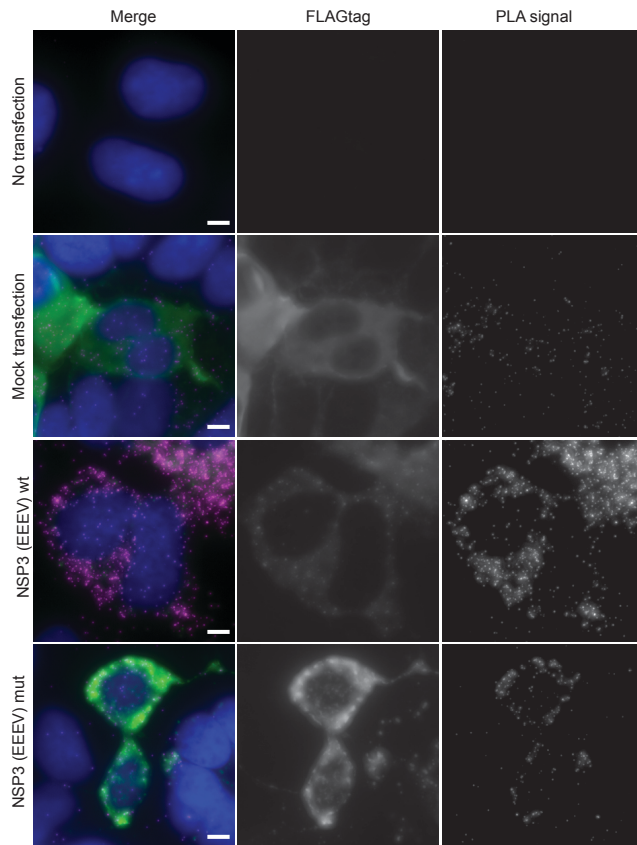

**Figure S8. Proximity ligation assay probing the interaction between endogenous clathrin and full-length FLAG-tagged NSP3 (EEEV) in HEK293 cells.** Fluorescence microscopy images. Nuclei are in blue, FLAG-tag in green and PLA signals visualizing clathrin-NSP3 (EEEV) interaction in magenta. Scale bar is 5  $\mu$ m.

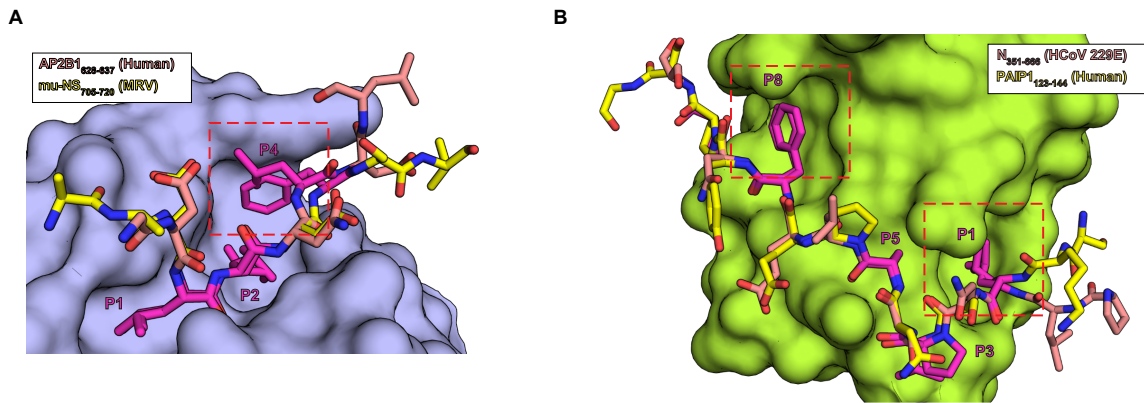

**Figure S9. Viral and human ligands bind the CLTC NTD and PABP1 PABC in similar conformation. (A)** Crystal structure model of CLTC NTD with superimposed viral ligand from mu-NS (MRV) in yellow and the human ligand from AP2B1 (PDBid: 5M5R) in salmon. The red rectangle highlights the different position of Phe and Leu in position P4. **(B)** Crystal structure model of PABP1 PABC with superimposed viral ligand from N (HCoV 229E) in salmon and the human ligand from PAIP1 (PDBid: 3NTW) in yellow. The red rectangles highlight the two hydrophobic binding pockets at position P1 and P8

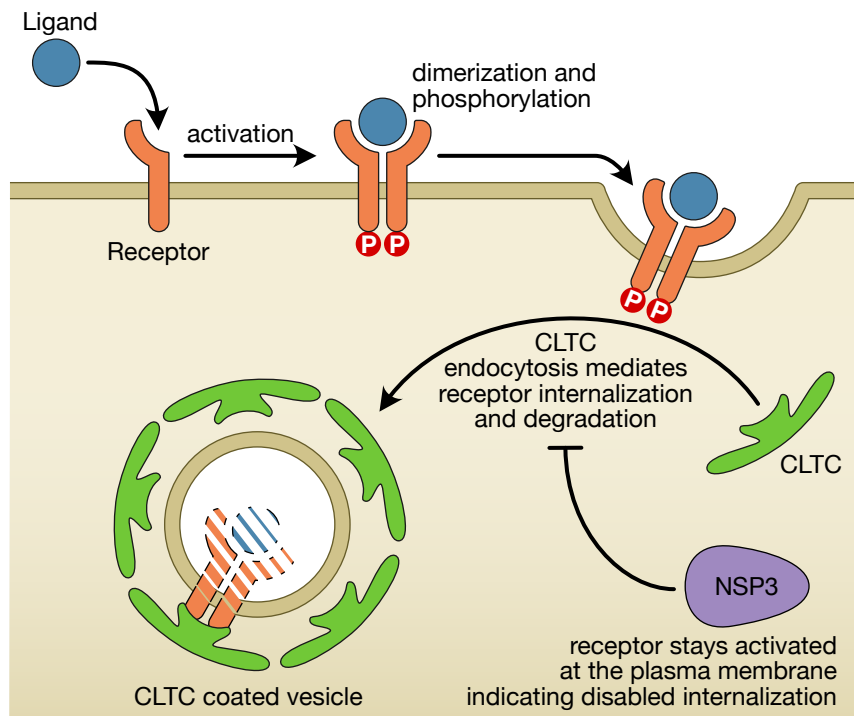

**Figure S10. Generalized model of the NSP3 (EEEV) effect on receptor internalization.**

Upon ligand binding the receptor dimerizes, is activated via autophosphorylation and subsequently internalized from the plasma membrane via clathrin mediated endocytosis. The presence of NSP3 (EEEV) causes the receptor to remain at the plasma membrane in its activated form indicating that clathrin-mediated endocytosis is not functioning properly.

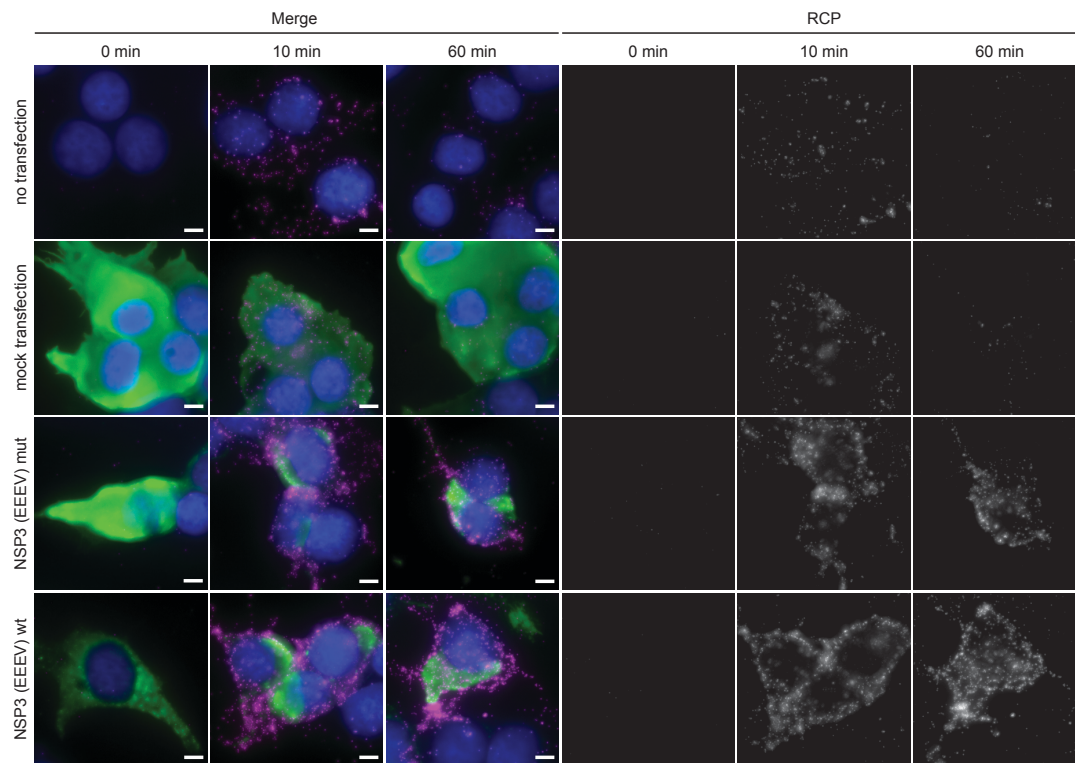

**Figure S11. Proximity ligation assay probing the activation of PDGFR $\beta$  in HEK293-PDGFR $\beta$ -HA cells.** Fluorescence microscopy images. Nuclei are in blue, FLAG-tag in green, and PLA signals visualizing phosphorylated PDGFR $\beta$  in magenta. Scale bar is 5  $\mu$ m. Six biological replicates were performed.

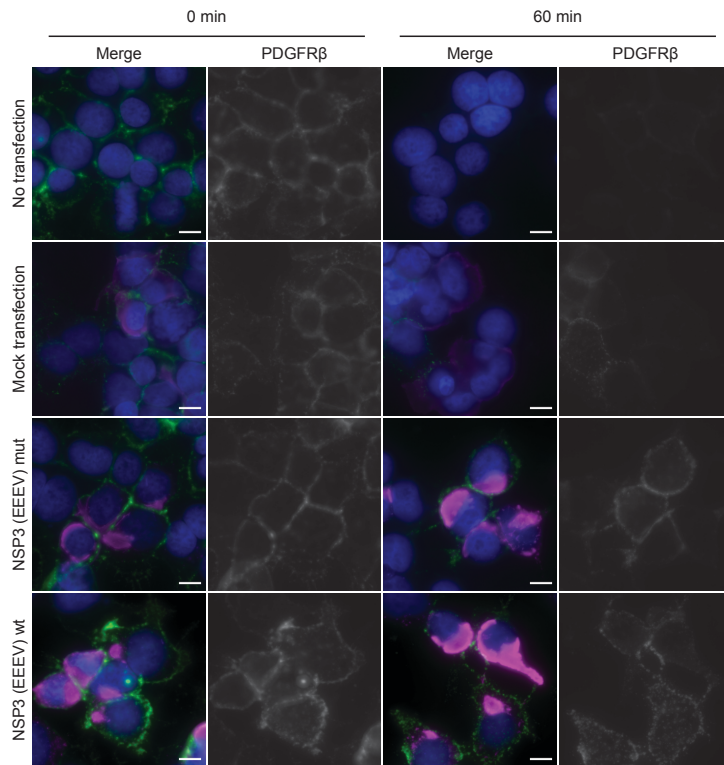

**Figure S12. Cell surface fluorescence probing the extracellular part of PDGFR $\beta$ .** Fluorescence microscopy images. Nuclei are in blue, FLAG-tag is in magenta, and PDGFR $\beta$  is in green. Scale bar is 5  $\mu$ m. Integrated fluorescence intensity was measured over 3 biological replicates

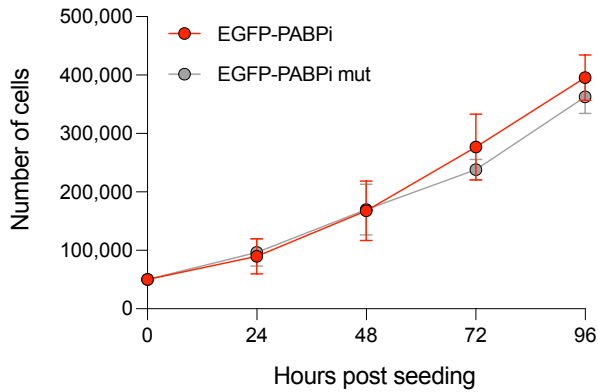

**Figure S13. Cell growth curve of VeroE6 cells expressing EGFP-PABPi or EGFP-PABPi mut.** Fifty thousand cells were seeded in 12-well plates and the cells were counted every 24 hours for four days. The data are presented as means  $\pm$  SD and were done in 6 biological replicates

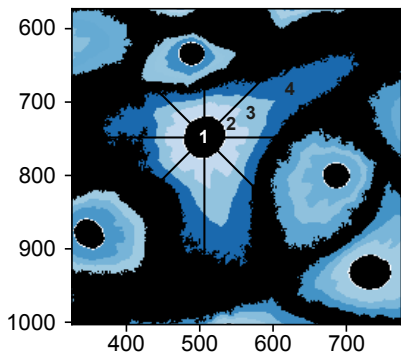

**Figure S14. Schematic representation of the measurement of signal distribution and localization in the cell shown (related to Figure 6J).** The distance and radius of the dsRNA replication complexes are detected and grouped in 4 fractions.

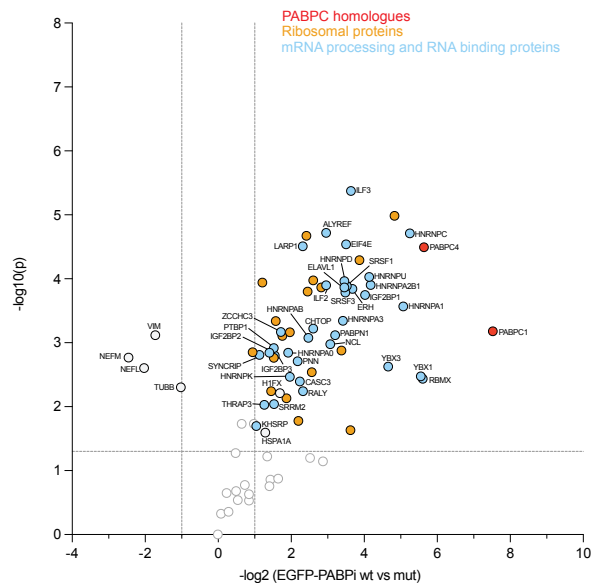

**Figure S15. AP-MS results of EGFP-PABPi pulldown from HEK293 cells.** Source data for is accessible in PRIDE database under accession [PXD033874](https://www.ebi.ac.uk/pride/archive/study/PXD033874).



## SUPPLEMENTAL TABLES

**Table S1.** Overview of crystallographic data.

|                                           | CLTC-EEV               | CLTC-mu-NS             | PAPBC1-HCoV           |
|-------------------------------------------|------------------------|------------------------|-----------------------|
| <b>Data Collection</b>                    |                        |                        |                       |
| Space group                               | C2                     | C2                     | C222 <sub>1</sub>     |
| <i>a</i> , <i>b</i> , <i>c</i> (Å)        | 136.9, 129.1, 77.9     | 137.53, 128.9, 78.10   | 63.51, 150.1, 65.5    |
| $\alpha$ , $\beta$ , $\gamma$ (°)         | 90, 115.3, 90          | 90.00 115.5 90.00      | 90.0 90.0 90.0        |
| Molecules in a. u.                        | 2                      | 2                      | 3                     |
| Wavelength (Å) <sup>a</sup>               | 0.9795                 | 0.9795                 | 1.003                 |
| Resolution (Å)                            | 70.41-1.96 (1.96-2.11) | 70.49-1.97 (1.97-2.11) | 43.63-1.93 (1.93-2.0) |
| Total reflections                         | 214797 (10220)         | 216228 (10833)         | 312878 (31260)        |
| Unique reflections                        | 62270 (3115)           | 61571 (3080)           | 23731 (2268)          |
| Multiplicity                              | 3.4 (3.3)              | 3.5 (3.5)              | 13.2 (13.8)           |
| Completeness (%)                          | 90.2 (36.2)            | 93.3 (65.2)            | 99.1 (98.5)           |
| $\langle I/\sigma(I) \rangle$             | 10.0 (1.6)             | 9.1 (1.4)              | 12.7 (1.3)            |
| Wilson B factor (Å <sup>2</sup> )         | 23.3                   | 43.4                   | 53.7                  |
| $R_{merge}$ <sup>b</sup>                  | 0.070 (0.673)          | 0.078 (0.815)          | 0.098 (0.052)         |
| $R_{meas}$                                | 0.083 (0.804)          | 0.093 (0.964)          | 0.106 (0.056)         |
| $R_{pim}$                                 | 0.044 (0.434)          | 0.049 (0.512)          | 0.030 (0.016)         |
| $CC_{1/2}$                                | 0.998 (0.629)          | 0.991 (0.561)          | 0.999 (0.999)         |
| <b>Refinement</b>                         |                        |                        |                       |
| No. of reflection in work set             | 59020                  | 58624                  | 23713                 |
| No. of reflection in free set             | 3160                   | 2950                   | 1124                  |
| $R_{work}$ <sup>c</sup>                   | 0.1800                 | 0.1854                 | 0.1980                |
| $R_{free}$ <sup>d</sup>                   | 0.2170                 | 0.2189                 | 0.2378                |
| No. of non-hydrogen atoms                 |                        |                        |                       |
| total                                     | 6354                   | 6293                   | 2268                  |
| Protein                                   | 5687                   | 5691                   | 1858                  |
| Solvent                                   | 506                    | 470                    | 119                   |
| Peptide                                   | 161                    | 132                    | 269                   |
| Other ligands                             | -                      | -                      | 19 (SO <sub>4</sub> ) |
| RMS deviations                            |                        |                        |                       |
| bonds (Å)                                 | 0.009                  | 0.013                  | 0.007                 |
| angles (°)                                | 1.57                   | 1.3                    | 0.788                 |
| Residues in Ramachandran plot regions (%) |                        |                        |                       |
| favored                                   | 98.49                  | 99.0                   | 99.3                  |
| allowed                                   | 1.51                   | 1.0                    | 0.4                   |
| outliers                                  | 0.00                   | 0.00                   | 0.4                   |
| Average B factor (Å <sup>2</sup> )        | 44.33                  | 55.68                  | 53.12                 |
| Protein                                   | 35.81                  | 41.93                  | 48.5                  |
| Solvent                                   | 40.13                  | 46.35                  | 56.42                 |
| Peptide                                   | 42.58                  | 49.8                   | 54.46                 |
| PDB-ID                                    | 7BN2                   | 7BN1                   | 7BN3                  |

<sup>a</sup> Values in parentheses are for the highest-resolution shell

<sup>b</sup>  $R_{merge} = \frac{\sum |I - \langle I \rangle|}{\sum (I)}$  where  $I$  is the observed integrated intensity,  $\langle I \rangle$  is the average integrated intensity obtained from multiple measurements, and the summation is over all observed reflections.

<sup>c</sup>  $R\text{-factor} = \frac{\sum_{(h,k,l)} \|F_{obs}(h,k,l) - F_{calc}(h,k,l)\|}{\sum_{(h,k,l)} |F_{obs}(h,k,l)|}$  where  $F_{obs}$  and  $F_{calc}$  are observed and calculated structure factors respectively.

<sup>d</sup>  $R_{free}$  was calculated as for  $R_{work}$  but only 5% data left out of refinement procedure has been used in the calculation

**Table S2. Reagent and resource table.**

| Reagent/resource                                | Reference or source                                                                     | Identifier, catalog number or reference                                                                |
|-------------------------------------------------|-----------------------------------------------------------------------------------------|--------------------------------------------------------------------------------------------------------|
| <b>Mammalian cells, bacteria, viral strains</b> |                                                                                         |                                                                                                        |
| HEK293                                          | Sigma                                                                                   | 85120602                                                                                               |
| HEK293T                                         | TakaraBio                                                                               | Z2180N (632180)                                                                                        |
| HEK293-PDGFR $\beta$ -HA                        | Kind gift from Frank Böhmer                                                             | <sup>1,2</sup>                                                                                         |
| VeroB4                                          | Kind gift of Gerhard Dobler<br>Bundeswehr Institute of Microbiology,<br>Munich, Germany |                                                                                                        |
| VeroE6                                          | Kind gift of Mattias Forsell Umeå<br>University                                         |                                                                                                        |
| SARS CoV-2                                      | Public Health Agency of Sweden                                                          | SARS-CoV-2/01/human2020/SWE<br>accession no/ <a href="#">GeneBank no</a><br><a href="#">MT093571.1</a> |
| JEV                                             | Public Health Agency of Sweden                                                          | Nakayama strain                                                                                        |
| WNV                                             | Public Health Agency of Sweden                                                          | WNV_0304h_ISR00                                                                                        |
| YFV                                             | Public Health Agency of Sweden                                                          | Asibi                                                                                                  |
| DENV                                            | Public Health Agency of Sweden                                                          | serotype-2; PNG/New Guinea C                                                                           |
| TBEV                                            |                                                                                         | Torö-2003 <sup>3</sup>                                                                                 |
| LGTV                                            | Kind gift of Gerhard Dobler<br>Bundeswehr Institute of Microbiology,<br>Munich, Germany | TP21                                                                                                   |
| ZIKV                                            | Kind gift of Gerhard Dobler<br>Bundeswehr Institute of Microbiology,<br>Munich, Germany | MR766                                                                                                  |
| RVFV                                            |                                                                                         | Katushka <sup>4</sup>                                                                                  |

|                                                                                                   |                                                          |                        |
|---------------------------------------------------------------------------------------------------|----------------------------------------------------------|------------------------|
| VSV                                                                                               | Kind gift of Friedemann Weber,<br>University of Freiburg |                        |
| SINV                                                                                              | Kind gift of Olivia Wesula Luande and<br>Magnus Evander  | Lovanger, KF737350     |
| CHIKV                                                                                             | Kind gift of Magnus Evander                              | CHIKV LR2006OPY1       |
| E.coli OmniMAX                                                                                    | Thermo Fisher Scientific                                 | C854003                |
| E.coli gold BL21 (DE3)                                                                            | Agilent technology                                       | 230132                 |
| NEB® Stable Competent <i>E. coli</i>                                                              | New England Biolabs                                      | C30401                 |
| <b>Recombinant DNA</b>                                                                            |                                                          |                        |
| pLJM1-EGFP                                                                                        | David Sabatini lab                                       | Addgene plasmid #19319 |
| psPAX2                                                                                            | Didier Trono lab                                         | Addgene plasmid #12260 |
| pMD2.G                                                                                            | Didier Trono lab                                         | Addgene plasmid #12259 |
|                                                                                                   |                                                          |                        |
| <b>Antibodies</b>                                                                                 |                                                          |                        |
| Goat-anti-FLAGtag                                                                                 | abcam                                                    | ab1257                 |
| Mouse-anti-FLAG M2                                                                                | Sigma Aldrich                                            | F1804                  |
| mouse-anti-clathrin                                                                               | abcam                                                    | ab2731                 |
| Goat-anti-GST                                                                                     | Cytiva                                                   | 274577012              |
| rabbit-anti-PDGFR $\beta$                                                                         | Cell Signaling Technology                                | #3169                  |
| mouse-anti-PDGFR $\beta$ -pY751                                                                   | Cell Signaling Technology                                | #3166                  |
| Donkey anti-Goat IgG (H+L) Highly<br>Cross-Adsorbed Secondary<br>Antibody, Alexa Fluor Plus 647   | Invitrogen                                               | A32849                 |
| Donkey anti-Rabbit IgG (H+L)<br>Highly Cross-Adsorbed Secondary<br>Antibody, Alexa Fluor Plus 555 | Invitrogen                                               | A32794                 |
| goat-anti PDGFR $\beta$                                                                           | RnD Systems                                              | AF385                  |
| rabbit-anti-FLAGtag                                                                               | Cell Signaling Technology                                | #14793S                |
| rabbit anti-SARS-CoV-2<br>Nucleocapsid                                                            | Sino Biological Inc                                      | 40143-R001             |
| mouse anti-TBEV E 19/1786                                                                         |                                                          | 5                      |

|                                                                                        |                     |              |
|----------------------------------------------------------------------------------------|---------------------|--------------|
| mouse anti-Flavivirus Group Antigen Antibody, clone D1-4G2-4-15                        | ATCC                | HB-112       |
| mouse anti-YFV E                                                                       | ATCC                | CRL 1689     |
| mouse anti dsRNA J2                                                                    | Scicons             | 10010500     |
| rabbit anti-VSV-G                                                                      | Sigma               | V4888-200UG  |
| donkey anti-Rabbit IgG (H+L) Highly Cross-Adsorbed Secondary Antibody, Alexa Fluor 555 | Invitrogen          | A-31572      |
| donkey anti-Mouse IgG (H+L) Highly Cross-Adsorbed Secondary Antibody, Alexa Fluor 555  | Invitrogen          | A31570       |
| Goat anti-Rabbit IgG (H+L) Secondary Antibody, HRP                                     | Invitrogen          | 31460        |
| Goat anti-Mouse IgG (H+L) Secondary Antibody, HRP                                      | Invitrogen          | 31430        |
| IRDye® 680RD Donkey anti-Goat IgG secondary Antibody                                   | LI-COR              | 925-68074    |
| IRDye® 800CW Goat anti-Mouse IgG Secondary Antibody                                    | LI-COR              | 925-32210    |
| <b>Oligonucleotides and sequence-based reagents</b>                                    |                     |              |
|                                                                                        |                     |              |
| <b>Chemicals, enzymes and other reagents</b>                                           |                     |              |
| Pierce™ Glutathione Agarose                                                            | Thermo Scientific   | 16100        |
| Ni sepharose™ excel                                                                    | Cytiva              | 17371201     |
| KH <sub>2</sub> PO <sub>4</sub>                                                        | Alfa Aesar          | 7778-77-0    |
| K <sub>2</sub> HPO <sub>4</sub>                                                        | VWR                 | 7758-11-4    |
| Peptone                                                                                | Sigma Aldrich       | 91249        |
| Yeast extract                                                                          | Merck Millipore     | 1.03753.0500 |
| DTT                                                                                    | Fisher bioreagents  | 3483-12-3    |
| NaCl                                                                                   | VWR                 | 27810.295    |
| TCEP                                                                                   | Thermo Scientific   | 20491        |
| Isopropyl-beta-D-thiogalactopyranoside                                                 | Biosynth Carbosynth | 367-93-1     |
| tris(hydroxymethyl)aminomethane                                                        | Merck Millipore     | 1.08382.1000 |

|                                        |                          |                         |
|----------------------------------------|--------------------------|-------------------------|
| Imidazole                              | Merck Millipore          | 1.04716.1000            |
| Kanamycin Sulfate                      | VWR                      | 25389-94-0              |
| Ampicillin                             | MEDA/Apoteket            | 011406                  |
| L-glutathion, reduced                  | Alfa Aesar               | A18014.06               |
| Mini-Protean TGX Stain-free gels       | Bio Rad                  | 4568096                 |
| RNase                                  | Roche                    | 10109134001             |
| DNase I                                | Roche                    | 10104159001             |
| 0.2 µm sterile filter                  | Sarstedt                 | 83.1826.001             |
| PreScission protease                   | Produced in-house        |                         |
| Thrombin                               | Cytiva                   | 27084601                |
| M13KO5 helper phage                    | ThermoFisher             | 18311019                |
| 50 bp marker                           | Thermo Scientific        | 10416014                |
| GelRed                                 | Biotium                  | 41003-T                 |
| QIAquick PCR Purification Kit          | Qiagen                   | 28104                   |
| Mag-Bind® TotalPure NGS                | Omega Bio-Tek            | M1378-00                |
| DMEM with GlutaMAX Supplement          | Gibco                    | 61965026                |
| DMEM/F-12                              | Gibco                    | 11320033                |
| FBS                                    | Gibco                    | 26140087                |
| MEM Non-Essential Amino Acids Solution | Gibco                    | 11140035                |
| Penicillin-Streptomycin                | Gibco                    | 15070063                |
| Lipofectamine 3000                     | Invitrogen               | L3000008                |
| Turbofect Transfection Reagent         | Thermo Scientific        | R0531                   |
| Polyethyleneimine, linear              | Thermo Scientific        | 43896                   |
| DPBS                                   | Gibco                    | 14190094                |
| NP-40 Substitute                       | Sigma                    | 74385                   |
| cOmplete, EDTA free protease inhibitor | Roche                    | 05056489001             |
| DC assay kit                           | Bio-Rad                  | 5000114/5000113/5000115 |
| GFP-Trap Dynabeads                     | Chromotek                | gtd-20                  |
| Lysozyme                               | ITW reagents             | A4972                   |
| Phusion High-Fidelity polymerase       | Thermo Fisher Scientific | F-530S                  |
| Trypsin                                | Promega                  | V5111sn                 |

|                                                           |                          |                                                                                                                                                                          |
|-----------------------------------------------------------|--------------------------|--------------------------------------------------------------------------------------------------------------------------------------------------------------------------|
| C18 membrane                                              | 3M Empore                | 2215                                                                                                                                                                     |
| Opti-MEM                                                  | Gibco                    | 11058021                                                                                                                                                                 |
| Intercept (TBS) Blocking Buffer                           | Li-cor                   | 927-60001                                                                                                                                                                |
| TrueBlue peroxidase substrate                             | KPL                      | KPLI50-78-02                                                                                                                                                             |
| Duolink PLA probe anti-Mouse PLUS                         | Olink                    | 82021                                                                                                                                                                    |
| Duolink PLA probe anti-Goat MINUS                         | Olink                    | 82006                                                                                                                                                                    |
| Duolink PLA probe anti-Rabbit MINUS                       | Olink                    | 82005                                                                                                                                                                    |
| Duolink Ligation solution                                 | Olink                    | 82009                                                                                                                                                                    |
| Duolink Amplification Red solution                        | Olink                    | 82018                                                                                                                                                                    |
| T4 DNA ligase                                             | Thermo Scientific        | EL0016                                                                                                                                                                   |
| Phi29 DNA polymerase                                      | Thermo Scientific        | 4002                                                                                                                                                                     |
| Recombinant Human PDGF-BB                                 | Peprotech                | 100-14B                                                                                                                                                                  |
|                                                           |                          |                                                                                                                                                                          |
| <b>Plates and flasks</b>                                  |                          |                                                                                                                                                                          |
| 175 cm <sup>2</sup> CellBIND™ Surface Cell Culture Flasks | Corning Life Sciences    | 3292                                                                                                                                                                     |
| Nunc MaxiSorp plates                                      | Thermo Fisher Scientific | 44-2404-21                                                                                                                                                               |
| Black, non-binding surface, flat bottom 96-well plates    | Corning Life Sciences    | 3993                                                                                                                                                                     |
| Tissue culture Dish 100mm                                 | Sarstedt                 | 83.3902                                                                                                                                                                  |
| Nunc™ Lab-Tek™ II CC2™ Chamber Slide System               | Sigma                    | S6815                                                                                                                                                                    |
| MRC 2 Well Crystallization Plate in UVXPO                 | Hampton Research         | HR3-106                                                                                                                                                                  |
| <b>Software</b>                                           |                          |                                                                                                                                                                          |
| MaxQuant                                                  | 2.0.1.0                  | <a href="https://www.maxquant.org/">https://www.maxquant.org/</a><br><a href="https://doi.org/10.1038/nbt.1511">https://doi.org/10.1038/nbt.1511</a>                     |
| Perseus                                                   | 2.0.3.0                  | <a href="https://www.maxquant.org/perseus/">https://www.maxquant.org/perseus/</a><br><a href="https://doi.org/10.1038/nmeth.3901">https://doi.org/10.1038/nmeth.3901</a> |
| Cellprofiler                                              | 3.0.0                    | <a href="https://cellprofiler.org/previous-releases">https://cellprofiler.org/previous-releases</a>                                                                      |
| Leica Application Suit X software                         |                          | Leica                                                                                                                                                                    |

|                                   |                             |                                                                                                                       |
|-----------------------------------|-----------------------------|-----------------------------------------------------------------------------------------------------------------------|
| Cytoscape                         | v.3.9.1                     | <a href="https://cytoscape.org/download.html">https://cytoscape.org/download.html</a>                                 |
| GraphPad Prism                    | v9.3.1                      | <a href="https://www.graphpad.com/scientific-software/prism/">https://www.graphpad.com/scientific-software/prism/</a> |
| Pymol                             | v2.3.5                      | <a href="https://pymol.org/2/">https://pymol.org/2/</a>                                                               |
| <b>Instruments and other</b>      |                             |                                                                                                                       |
| iD5 plate reader                  | Molecular Devices           |                                                                                                                       |
| iD5 plate reader                  | Molecular Devices           |                                                                                                                       |
| Concentrator Plus                 | Eppendorf                   |                                                                                                                       |
| Illumina MiSeq v3                 | Illumina                    | MS-102-3001                                                                                                           |
| Syringe filter, Filtropur S       | Sarstedt                    | 83.1826.001                                                                                                           |
| Easy-nLC 1000                     | Thermo Scientific           |                                                                                                                       |
| Zen 2 (Blue edition)              | Zeiss                       |                                                                                                                       |
| Acclaim PepMap 100 pre-column     | Thermo Scientific           | 164535                                                                                                                |
| PepMap RSLC C18 analytical column | Thermo Scientific           | 164534                                                                                                                |
| Q Exactive Plus                   | Thermo Scientific           |                                                                                                                       |
| TROPHOS Plate RUNNER HD®          | Dioscure, Marseille, France |                                                                                                                       |
| Plate washer                      | Molecular devices           |                                                                                                                       |
| Odyssey CLx Imaging system        | LI-COR                      | 9140                                                                                                                  |
| MALDI TOF/MS Ultraflex III        | Bruker                      |                                                                                                                       |
| Diamond Light Source              |                             | Didcot, UK                                                                                                            |
| Zeiss Imager Z2                   | Zeiss                       |                                                                                                                       |

## References

1. Markova, B., Herrlich, P., Ronnstrand, L. & Bohmer, F.D. Identification of protein tyrosine phosphatases associating with the PDGF receptor. *Biochemistry* **42**, 2691-9 (2003).
2. Tenev, T. et al. Perinuclear localization of the protein-tyrosine phosphatase SHP-1 and inhibition of epidermal growth factor-stimulated STAT1/3 activation in A431 cells. *Eur J Cell Biol* **79**, 261-71 (2000).
3. Asghar, N. et al. The role of the poly(A) tract in the replication and virulence of tick-borne encephalitis virus. *Sci Rep* **6**, 39265 (2016).
4. Islam, M.K. et al. Anti-Rift Valley fever virus activity in vitro, pre-clinical pharmacokinetics and oral bioavailability of benzavir-2, a broad-acting antiviral compound. *Sci Rep* **8**, 1925 (2018).
5. Niedrig, M. et al. Monoclonal antibodies directed against tick-borne encephalitis virus with neutralizing activity in vivo. *Acta Virol* **38**, 141-9 (1994).
