# Supplementary material
Source: PubMed Central journal article supplement (PMC10133390)
Supplement: 41467_2023_38015_MOESM2_ESM.pdf [file 41467_2023_38015_MOESM2_ESM.pdf]

**Title: Supplementary data 1.**

**Description:** RiboVD library design and sequenced coverage.

**Title: Supplementary data 2.**

**Description:** Table of expression constructs and information on proteins screened.

**Title: Supplementary data 3.**

**Description:** RiboVD selection results. Information is provided on bait protein used, confidence of interaction, peptide found, annotation on host protein, viral species and viral family.

**Title: Supplementary data 4.**

**Description:** RiboVD motif benchmarking set.

**Title: Supplementary data 5.**

**Description:** RiboVD protein-protein interaction benchmarking set.

**Title: Supplementary data 6.**

**Description:** Co-occurrence of viral SLiMs targeting human bait-bait pairs.

**Title: Supplementary data 7.**

**Description:** GO term enrichment analysis of expanded host-virus network.

**Title: Supplementary data 8.**

**Description:** Overview of peptides used for affinity measurements together with resulting affinity data.

**Title: Supplementary data 9.**

**Description:** Details of constructs used for cell based experiments.

**Title: Supplementary data 10.**

**Description:** AP-MS data.
